# Supplementary material for: Unexpected large evasion fluxes of carbon dioxide from turbulent streams draining the world’s mountains
Source: Springer Nature journal article supplement (doi:10.1038/s41467-019-12905-z), 2019-10-25
Supplement: 41467_2019_12905_MOESM1_ESM.pdf [file 41467_2019_12905_MOESM1_ESM.pdf]

Supplementary Information for

UNEXPECTED LARGE EVASION FLUXES OF CARBON DIOXIDE FROM  
TURBULENT STREAMS DRAINING THE WORLD'S MOUNTAINS

by ÅSA HORGBY et al.

## Supplementary Note 1

Marx and colleagues (2017) show that small streams (catchment sizes  $<30 \text{ km}^2$ ) have high geochemical variability but are skewed towards the carbonate end-member. This is related to short residence times in small headwater catchments, which favors fast weathered bedrock, such as carbonate bedrock weathering, rather than silicate weathering<sup>1</sup>. We repeated the analysis from Marx and colleagues using the same database, the Global River Chemistry database (GLORICH)<sup>2</sup>, together with data from our Swiss monitoring stations. The geochemical characterization shows that the Swiss sites are indeed influenced by carbonate bedrock weathering (Supplementary Figure 4).

## Supplementary Note 2

We evaluated differences between geopredictors for Swiss streams derived from data sets with different resolutions (highly resolved Swiss dataset and lower resolved globally available dataset; Supplementary Figure 6) to be confident that the stream channel slopes (Supplementary Figure 6A) stream altitude (Supplementary Figure 6B) and stream discharge (Supplementary Figure 6C) did not deviate considerably depending on data resolution. The distributions of the data were similar for the two datasets, although slope was somewhat lower in the high-resolution data set (median  $0.039 \text{ m m}^{-1}$ , CI:  $0.004$  and  $0.176 \text{ m m}^{-1}$ ) compared to the low-resolution data set (median  $0.055 \text{ m m}^{-1}$ , CI:  $0.004$  and  $0.222 \text{ m m}^{-1}$ ). Altitude was slightly higher in the high-resolution data set (median  $902 \text{ m}$ , CI:  $415$  and  $2185 \text{ m}$ ) compared to the low-resolution data set (median  $834 \text{ m}$ , CI:  $406$  and  $2141 \text{ m}$ ). Discharge was similar between the high-resolution data set (median  $0.38 \text{ m}^3 \text{ s}^{-1}$ , CI:  $0.09$  and  $1.77 \text{ m}^3 \text{ s}^{-1}$ ) and the low-resolution data set (median  $0.38 \text{ m}^3 \text{ s}^{-1}$ , CI:  $0.12$  and  $1.82 \text{ m}^3 \text{ s}^{-1}$ ).

Moreover, for all our monitoring stations in the Swiss Alps (Supplementary Figure 1) we measured stream channel slope every 10 meters' distance in the field using a dGPS system. We then compared the difference in stream channel slopes calculated for whole stream reaches with channel slopes calculated from segments of 10 m in length each. We found that in average the slope is underestimated by  $0.022 \text{ m m}^{-1}$  when using mean reach slope and not considering the variations in slopes along a stream reach. The maximum slope measured along the reach (10 m sub-reaches) deviated significantly from the mean reach slopes, and was up to  $0.60 \text{ m m}^{-1}$  higher. Across all 12 catchments, the maximum slope was  $0.42 \text{ m m}^{-1}$  higher compared to the reach slope. This suggests that the  $k_{\text{CO}_2}$  values may be even higher than estimated in this study for Switzerland (median  $86.4 \text{ m d}^{-1}$ , CI:  $6.0$  and  $461.9 \text{ m d}^{-1}$ ) and for mountain streams worldwide (median  $25.6 \text{ m d}^{-1}$ , CI:  $3.5$  and  $410.6 \text{ m d}^{-1}$ ). Predicted streamwater  $p\text{CO}_2$  was similar in Swiss streams (median  $705 \text{ } \mu\text{atm}$ , CI:  $380$  and  $1224 \text{ } \mu\text{atm}$ ) and at the global extent (median  $737 \text{ } \mu\text{atm}$ , CI:  $317$  and  $1644 \text{ } \mu\text{atm}$ ). 10.8% of the Swiss mountain streams, and the same proportion of the mountain streams worldwide has negative  $\Delta\text{CO}_2$  meaning that they fall below atmospheric saturation. The median areal  $\text{CO}_2$  fluxes are higher from Swiss mountain streams (median  $3.6 \text{ kg C m}^{-2} \text{ yr}^{-1}$ , CI:  $-0.5$  and  $23.5 \text{ kg C m}^{-2} \text{ yr}^{-1}$ ) compared to mountain streams worldwide (median  $1.1 \text{ kg C m}^{-2} \text{ yr}^{-1}$ , CI:  $-0.5$  and  $32.1 \text{ kg C m}^{-2} \text{ yr}^{-1}$ ) (Supplementary Figure 7).

### Supplementary Note 3

Estimating CO<sub>2</sub> fluxes based on mean or median values of CO<sub>2</sub> and discharge, instead of highly resolved data, may induce errors due to the temporal variability. We compared CO<sub>2</sub> fluxes derived from measured data at 10-minute time steps with CO<sub>2</sub> fluxes predicted using our CO<sub>2</sub> prediction model combined with Q from GloRiC. Due to data availability, this analysis was possible at 7 of our 12 high-altitude Alpine monitoring stations. Despite high temporal variability in CO<sub>2</sub> fluxes, we found median areal fluxes at the monitoring stations corresponding relatively well to the areal fluxes that we predicted in our study where the slope between  $F_{\text{CO}_2}$  predicted by the model and  $F_{\text{CO}_2}$  calculated from 10-minute time series was  $-0.921 \pm 0.284$  ( $R^2 = 0.68$ ,  $n = 7$ ,  $P = 0.0022$ ) (Supplementary Figure 9).

## Supplementary Figures

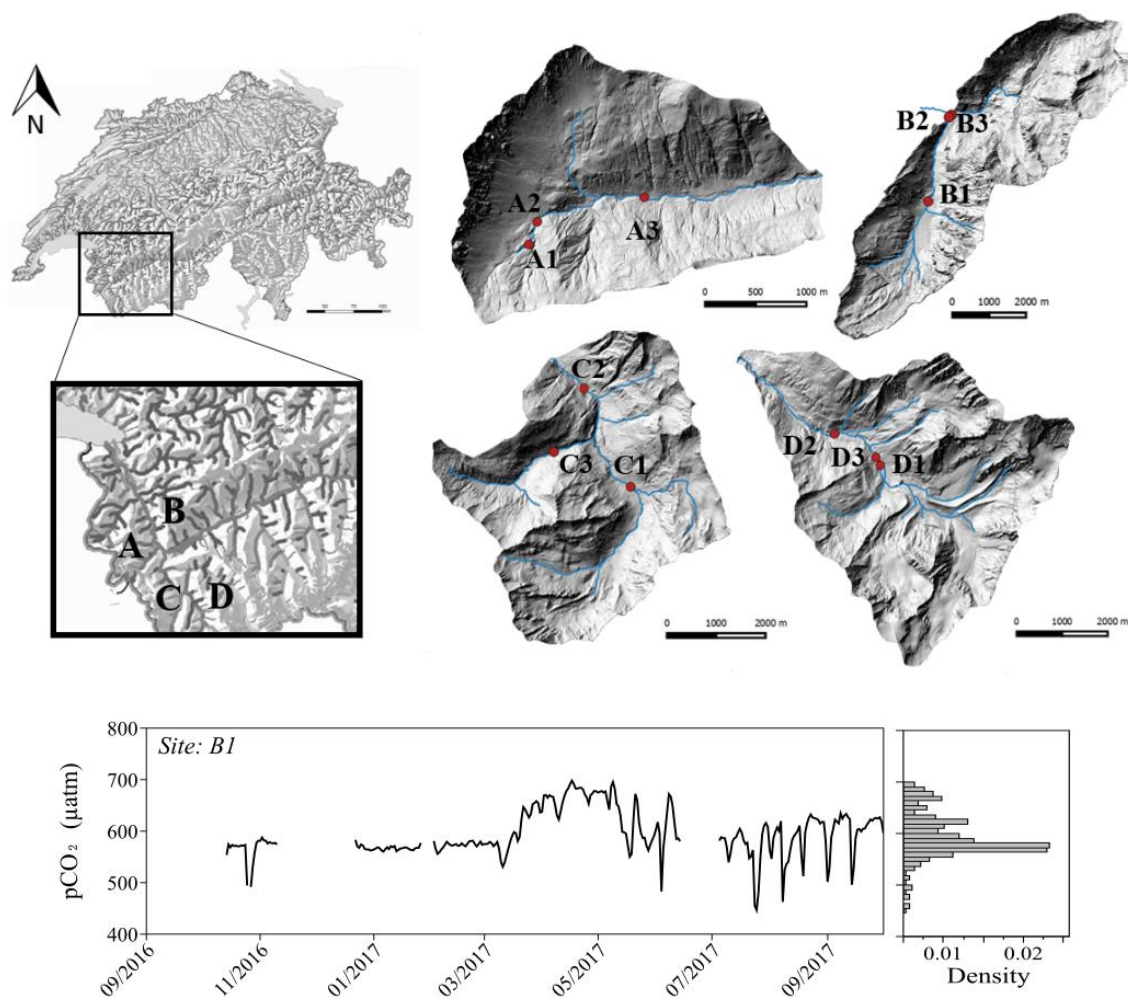

**Supplementary Figure 1.** We continuously monitored  $p\text{CO}_2$  in 12 streams located in 4 Alpine catchments in Switzerland. Our 12 mountain stream monitoring stations measured streamwater  $p\text{CO}_2$  levels close to saturation throughout the year (median  $p\text{CO}_2$  397 to 673  $\mu\text{atm}$ ; Supplementary Table 1).

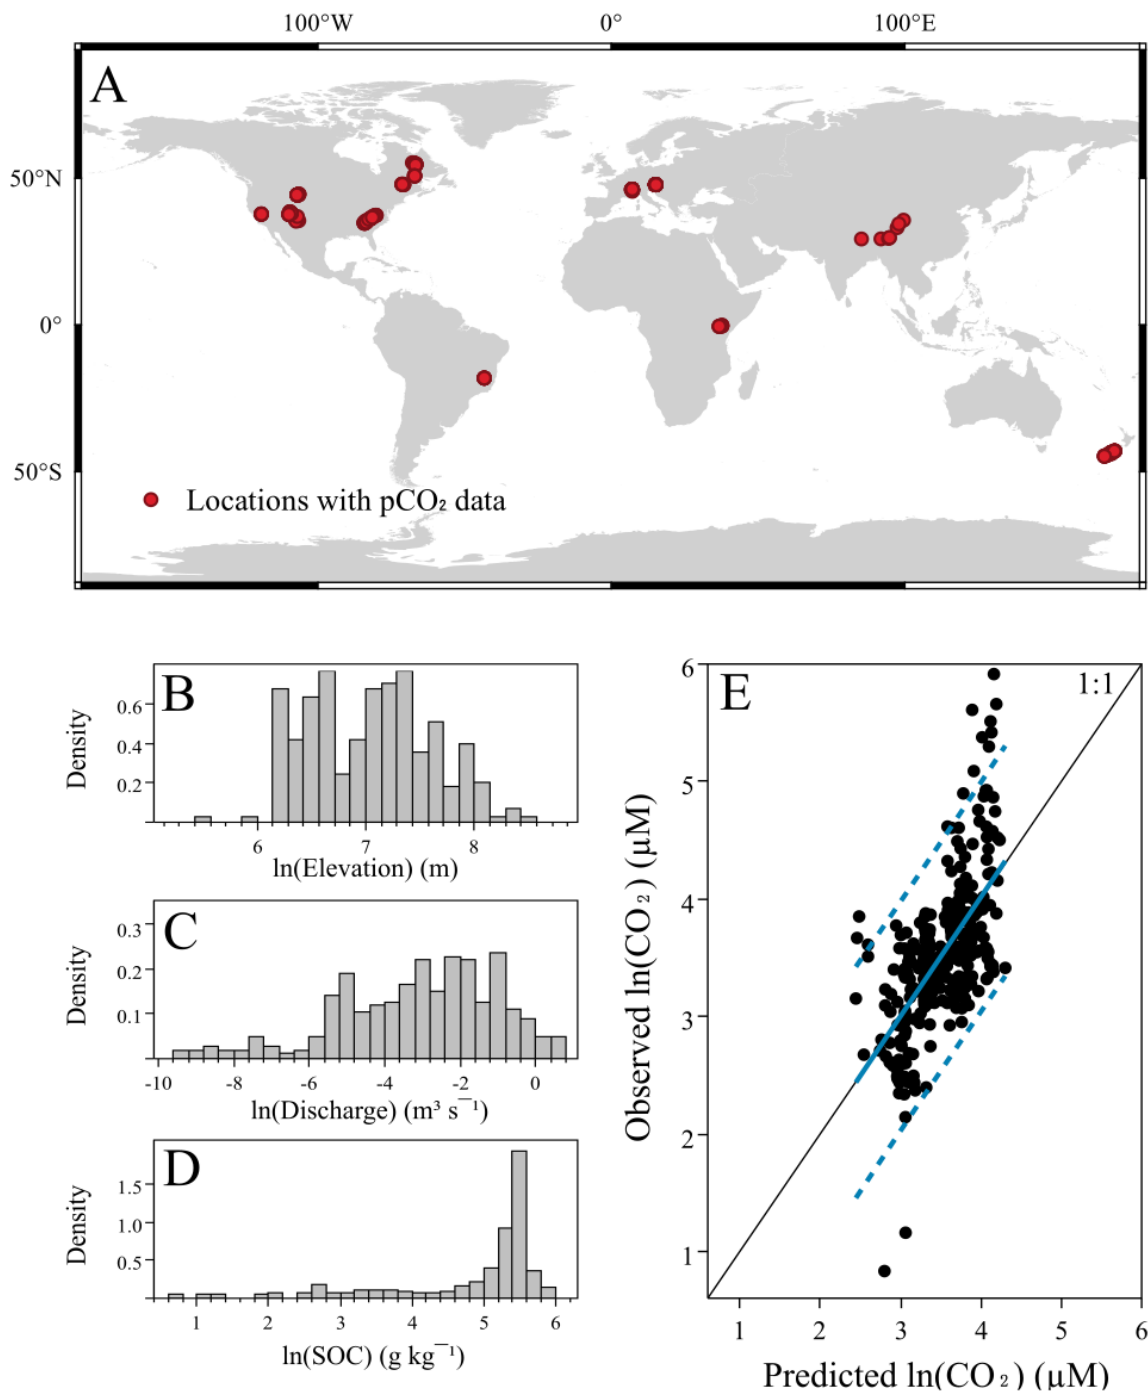

**Supplementary Figure 2. Data input of the CO<sub>2</sub> model.** Sampling locations for the mountain stream CO<sub>2</sub> data used for the prediction model (A). Shown are also density distributions of elevation (B), discharge (C) and soil organic carbon (SOC) (D), used as input parameters for the prediction of streamwater CO<sub>2</sub> concentrations (E). Observed versus predicted CO<sub>2</sub> followed the 1:1 line (blue) and fell within the 95% prediction confidence intervals (dashed blue lines) except for at very high CO<sub>2</sub> concentrations where CO<sub>2</sub> was underpredicted.

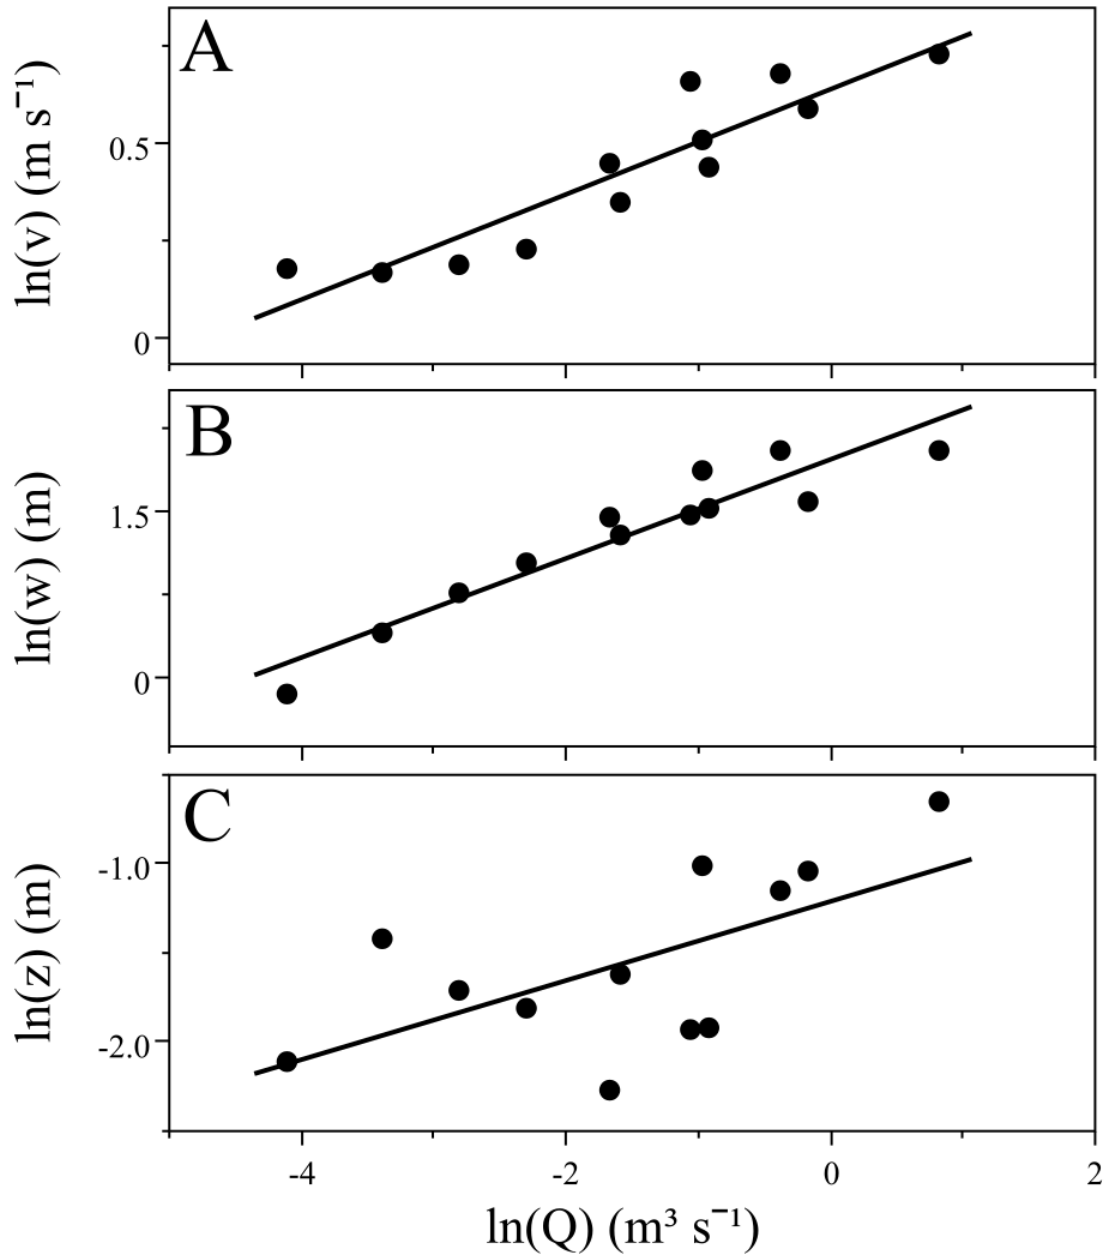

**Supplementary Figure 3. Hydraulic scaling relationship (natural log) between annual average stream discharge (Q) and flow velocity (v), stream width (w) and stream depth (z).** The relationships are derived from 141 measurements (7-17 measurements per sites) at 12 mountain stream monitoring stations in the Swiss Alps (velocity:  $\ln(v) = 0.365 \times \ln(Q) - 0.403$ ,  $R^2 = 0.87$ ; width:  $\ln(w) = 0.447 \times \ln(Q) + 1.961$ ,  $R^2 = 0.90$ ; depth:  $\ln(z) = 0.222 \times \ln(Q) - 1.212$ ,  $R^2 = 0.39$ ).

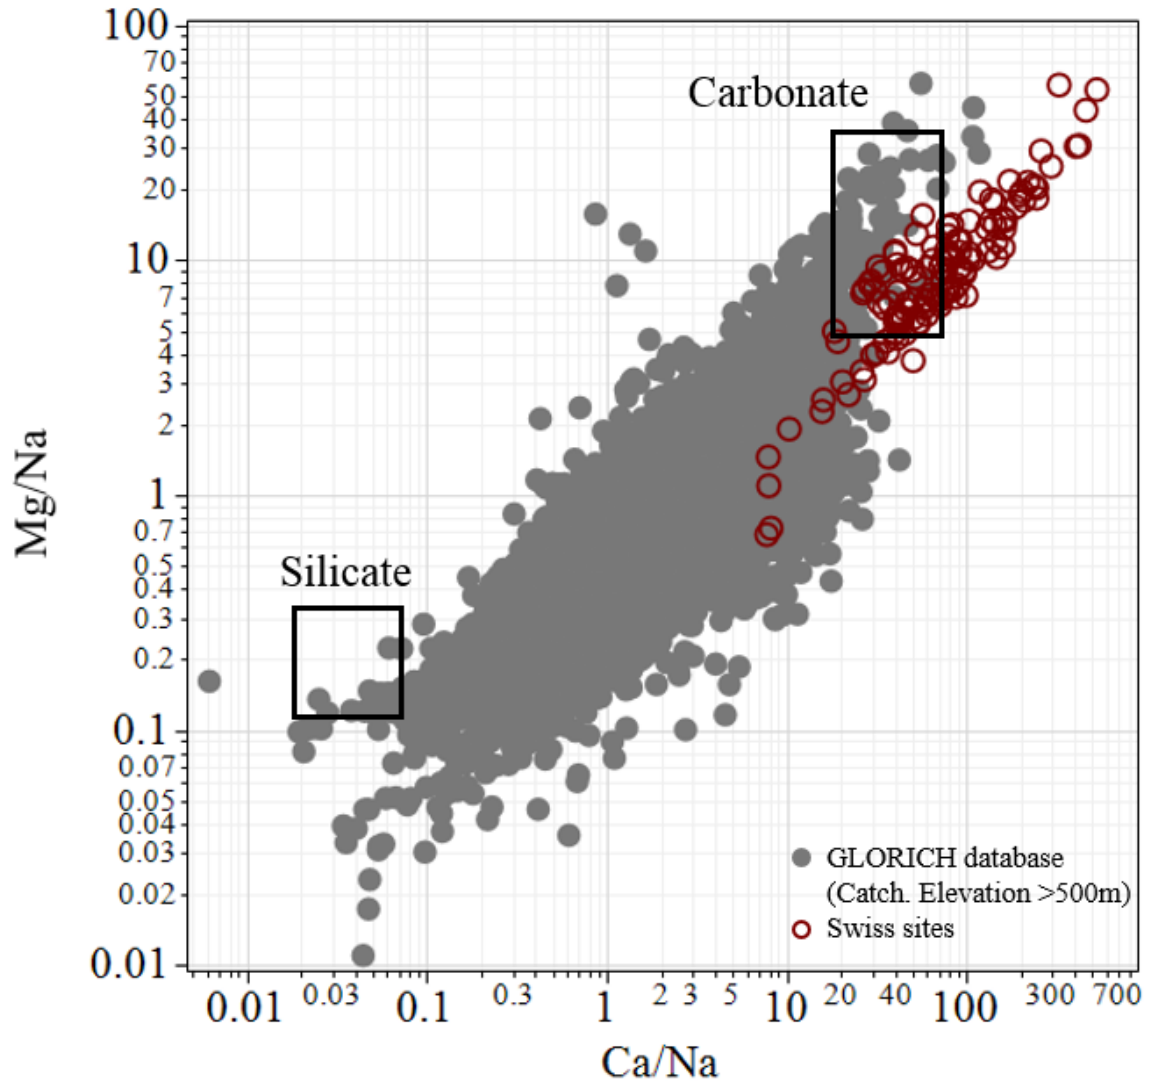

**Supplementary Figure 4. Water samples from the Swiss sites (red) are all close to the carbonate end-member in this  $\text{Na}^+$ -normalized mixing diagram. The Swiss sites have similar  $\text{Mg}^{2+}/\text{Na}^+$  and  $\text{Ca}^{2+}/\text{Na}^+$  molar ratios as the carbonated sites in the GLOORICH database (gray)<sup>1-3</sup>.**

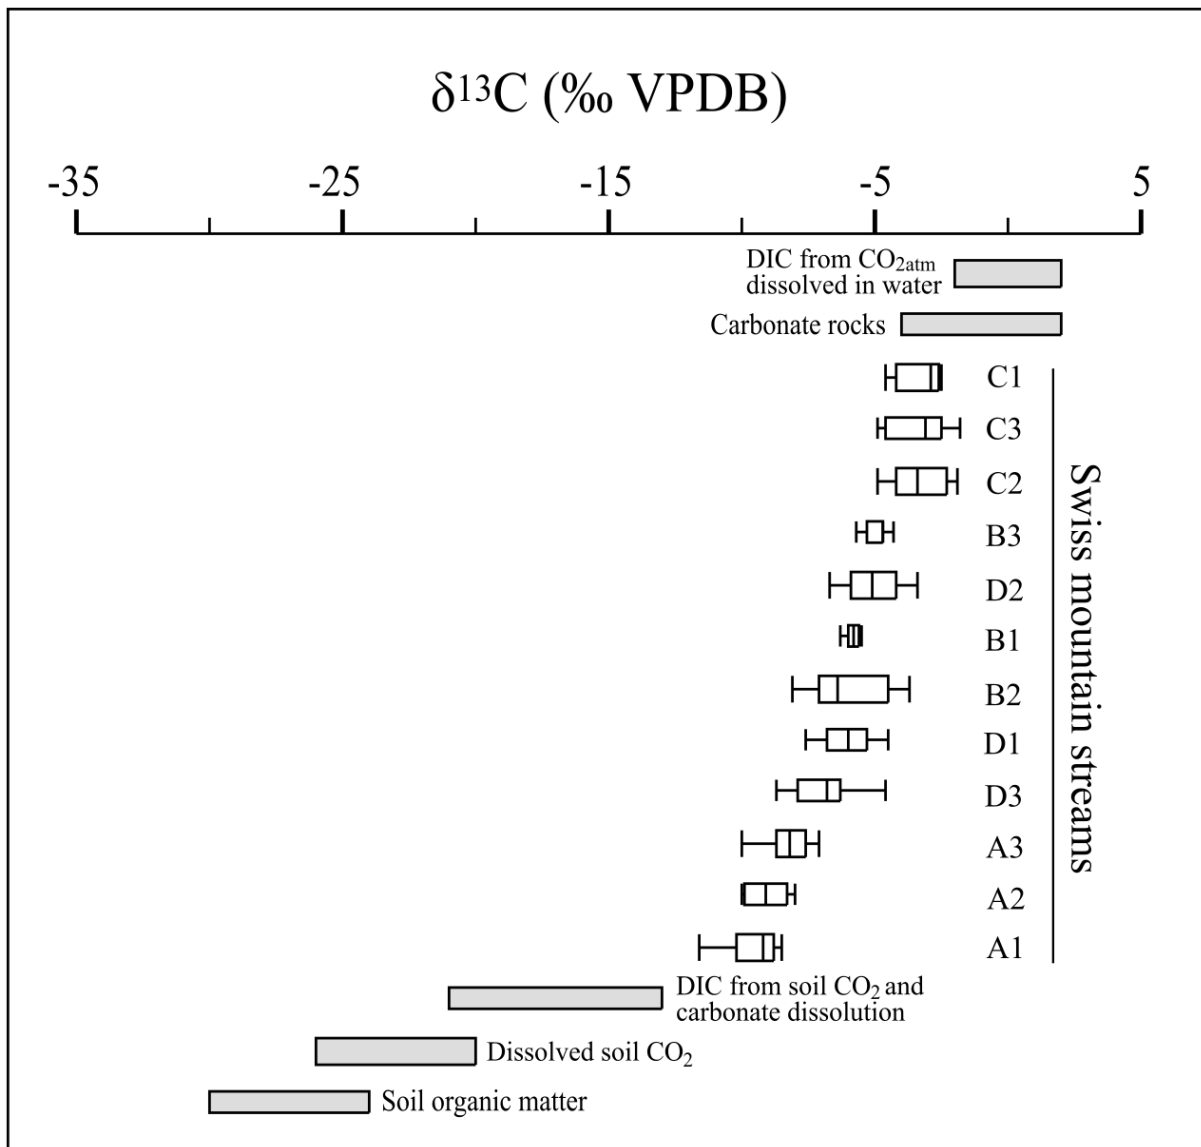

**Supplementary Figure 5. Isotopic composition of the streamwater DIC ( $\delta^{13}\text{C}$ -DIC) for the 12 study streams (7 to 15 samples per stream). End-members are adopted from refs. <sup>4,5</sup>. The box plots show median and quartile  $\delta^{13}\text{C}$ -DIC compositions (calculated in JMP 13, SAS Institute Inc., USA).**



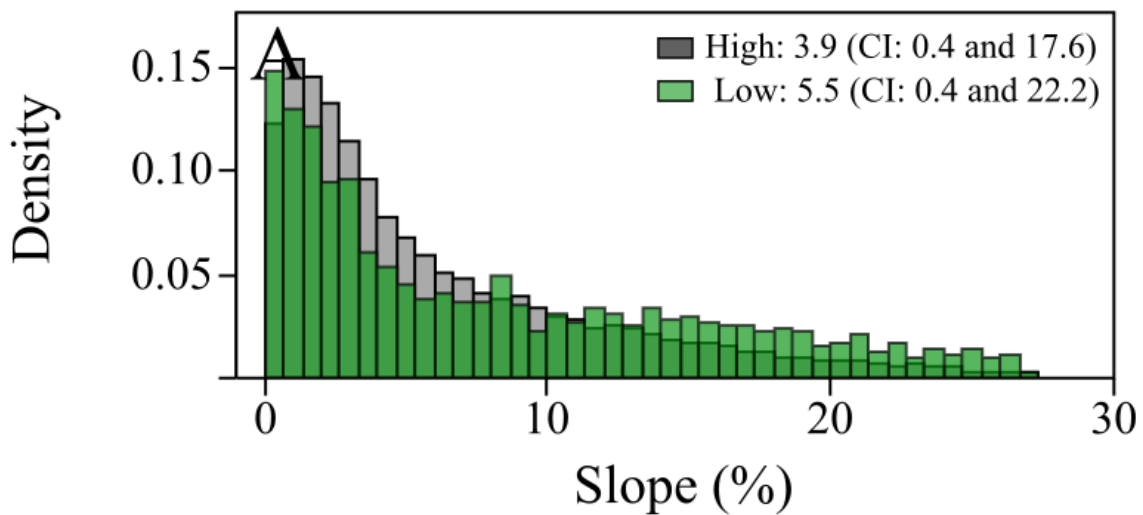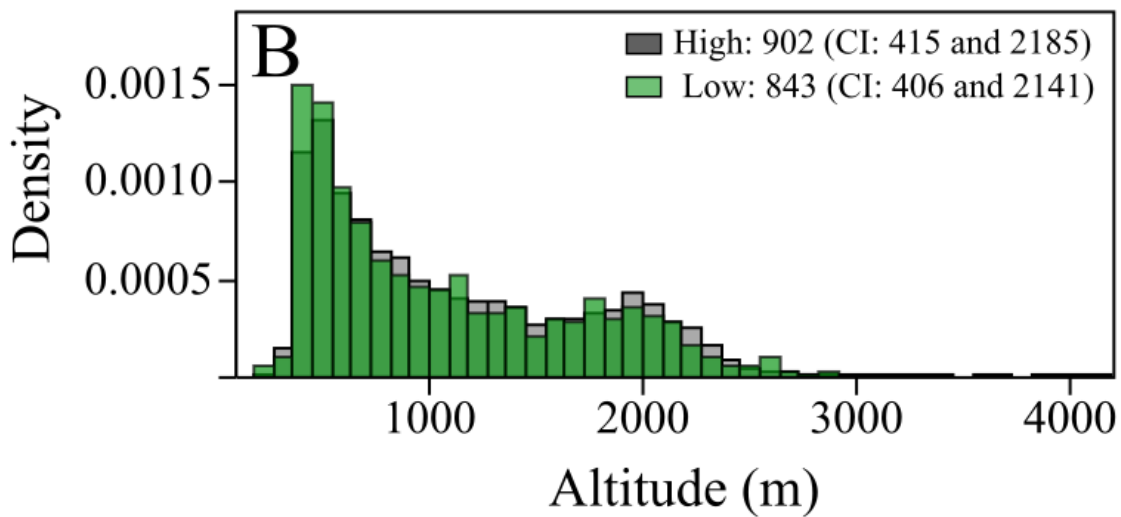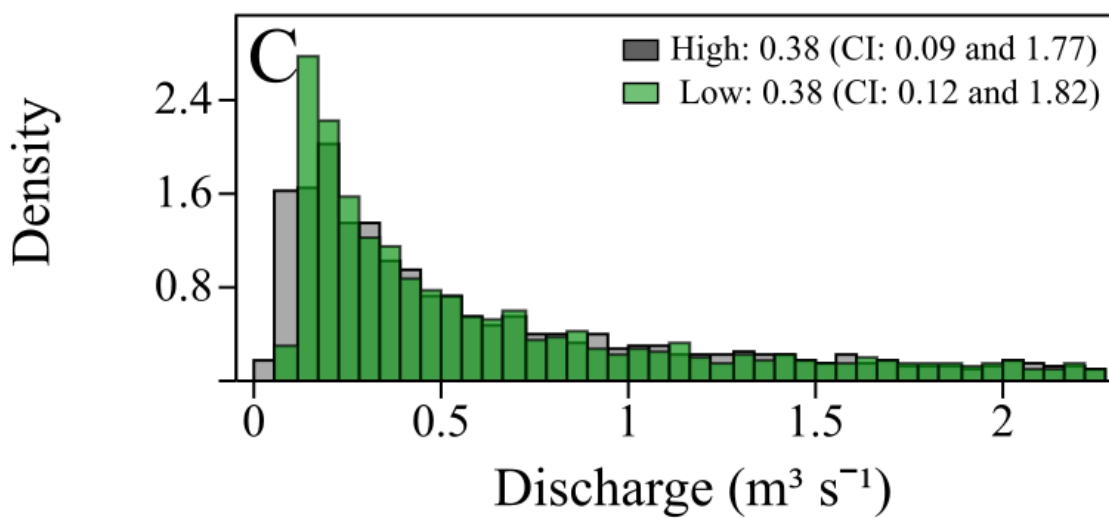

**Supplementary Figure 6. Distributions of the main input parameters used for estimation of CO<sub>2</sub> fluxes.** Slope (A), altitude (B) and discharge (C) of Swiss mountain streams derived from the high-resolution (grey) and low-resolution (green) data sets.

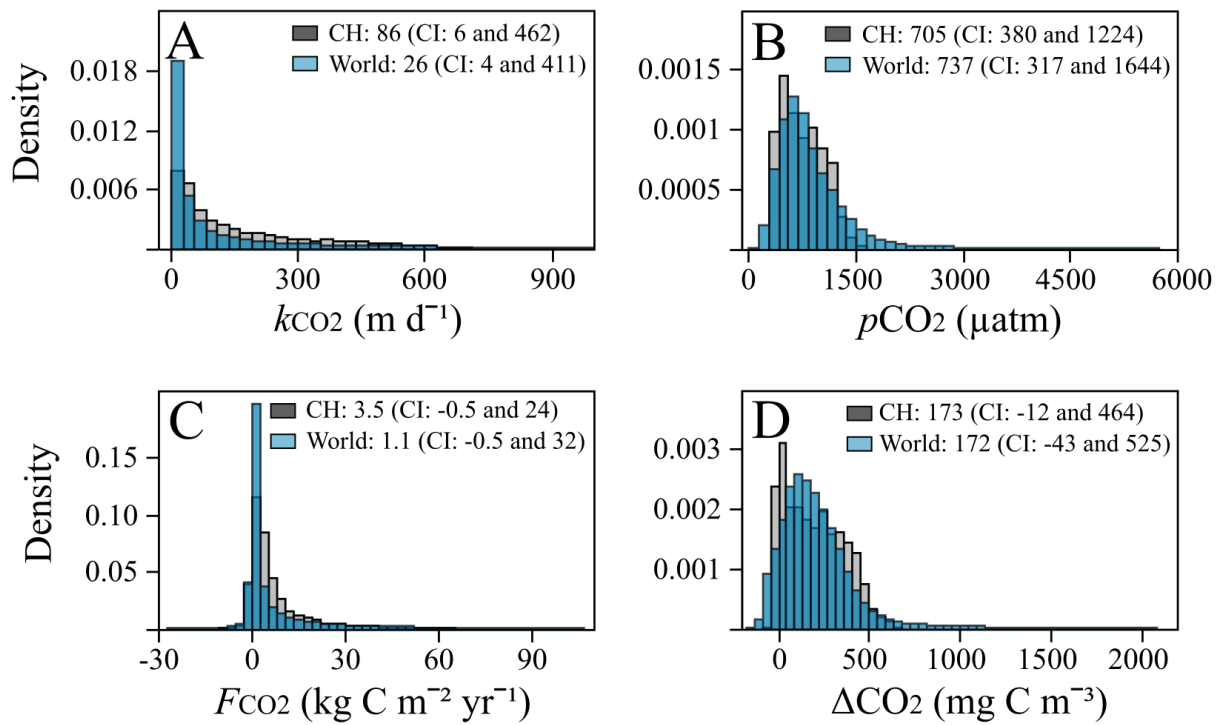

**Supplementary Figure 7. Density distributions of  $k_{CO_2}$  (A),  $p_{CO_2}$  (B),  $F_{CO_2}$  (C) and  $\Delta CO_2$  (D) calculated for 23,343 Swiss mountain streams (CH; grey) and 1,872,874 mountain streams worldwide (World; blue).**

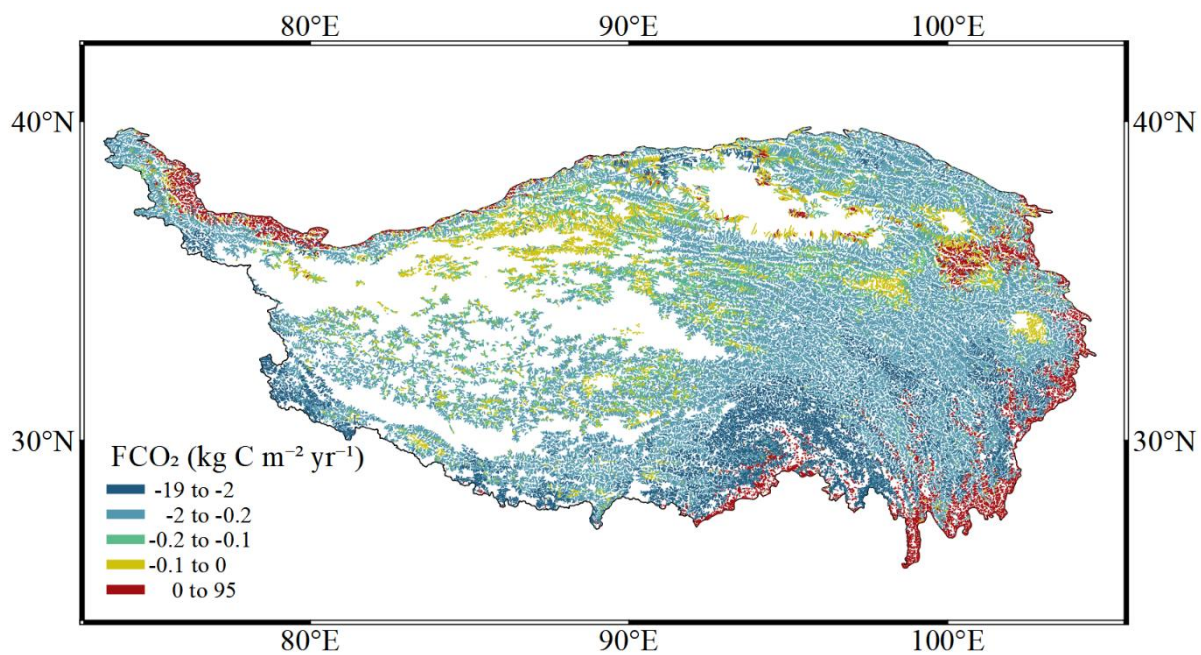

**Supplementary Figure 8. Most streams at the Tibetan plateau are undersaturated in CO<sub>2</sub> with respect to the atmosphere and likely acts as a CO<sub>2</sub> sink.** Streamwater  $p\text{CO}_2$  was mainly undersaturated with respect to the atmosphere (median 288  $\mu\text{atm}$ , CI: 194 and 449  $\mu\text{atm}$ ) and 88% of the streams had negative CO<sub>2</sub> fluxes.

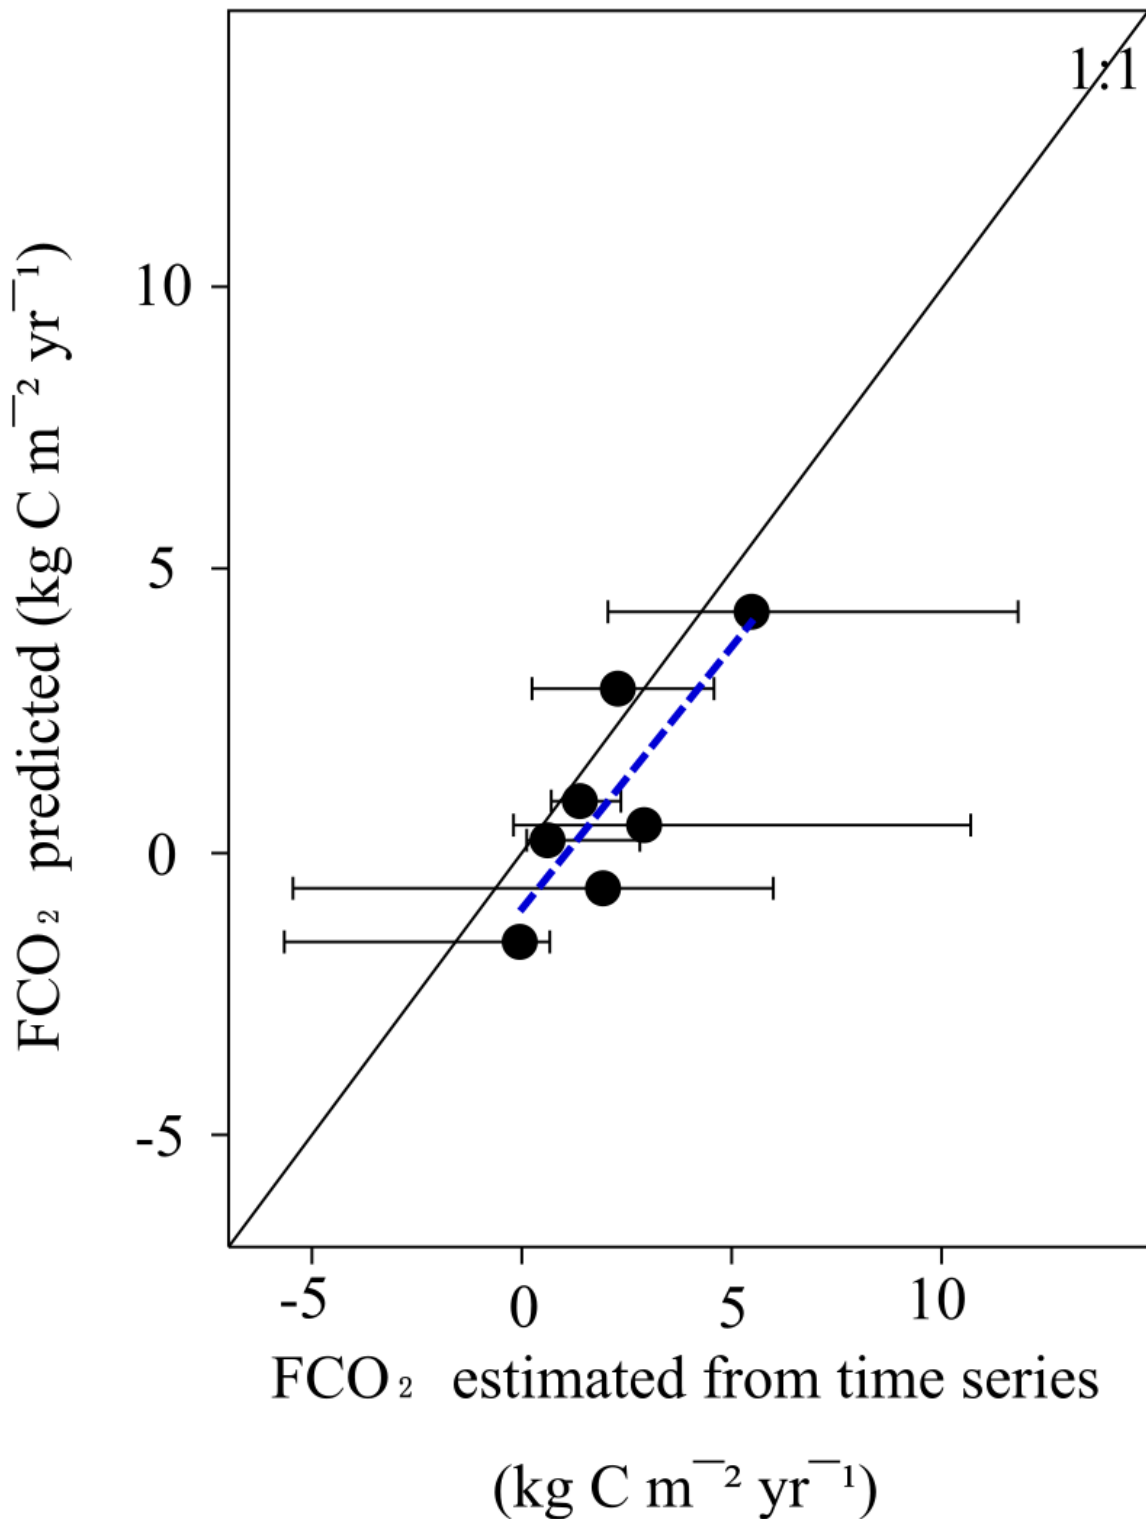

**Supplementary Figure 9. The predicted CO<sub>2</sub> flux corresponded well to the median CO<sub>2</sub> flux estimated from time series (10-minute time steps).** Median values (black dots) and 95% confidence intervals (error bars) of  $F_{CO_2}$  predicted from the CO<sub>2</sub> model versus median values based on time series (Predicted  $F_{CO_2} = 0.926 \pm 0.284 \times$  Measured  $F_{CO_2} - 0.981 \pm 0.752$ ,  $R^2 = 0.68$ ,  $n = 7$ ,  $P=0.022$ ). Units are expressed in kg C m<sup>-2</sup> yr<sup>-1</sup> for consistency with other flux estimates reported in this study.

## Supplementary Tables

**Supplementary Table 1.** Stream characteristics at the 12 Alpine monitoring stations.

| <b>Site</b> | <b>Latitude</b> | <b>Longitude</b> | <b>Altitude (m)</b> | <b>Slope (m m-1)</b> | <b>Mean (<math>\pm</math>std.)<br/><math>p\text{CO}_2</math> (<math>\mu\text{atm}</math>)</b> | <b>Median<br/><math>p\text{CO}_2</math><br/>(<math>\mu\text{atm}</math>)</b> |
|-------------|-----------------|------------------|---------------------|----------------------|-----------------------------------------------------------------------------------------------|------------------------------------------------------------------------------|
| A1          | 46.1549         | 6.8002           | 1689                | 0.056                | 511 $\pm$ 62                                                                                  | 502                                                                          |
| A2          | 46.157          | 6.8012           | 1630                | 0.16                 | 527 $\pm$ 84                                                                                  | 501                                                                          |
| A3          | 46.1593         | 6.81473          | 1415                | 0.097                | 687 $\pm$ 221                                                                                 | 593                                                                          |
| B1          | 46.2316         | 7.10197          | 1465                | 0.048                | 566 $\pm$ 69                                                                                  | 579                                                                          |
| B2          | 46.2534         | 7.10963          | 1201                | 0.137                | 457 $\pm$ 26                                                                                  | 454                                                                          |
| B3          | 46.2535         | 7.11011          | 1200                | 0.138                | 486 $\pm$ 43                                                                                  | 473                                                                          |
| C1          | 45.8831         | 7.13095          | 1995                | 0.054                | 699 $\pm$ 220                                                                                 | 673                                                                          |
| C2          | 45.9051         | 7.1156           | 1774                | 0.033                | 472 $\pm$ 57                                                                                  | 454                                                                          |
| C3          | 45.8937         | 7.10797          | 2027                | 0.059                | 525 $\pm$ 55                                                                                  | 523                                                                          |
| D1          | 45.9295         | 7.24458          | 2148                | 0.059                | 388 $\pm$ 43                                                                                  | 397                                                                          |
| D2          | 45.935          | 7.2269           | 1937                | 0.103                | 427 $\pm$ 39                                                                                  | 430                                                                          |
| D3          | 45.5568         | 7.14752          | 2161                | 0.078                | 473 $\pm$ 132                                                                                 | 465                                                                          |

**Supplementary Table 2.** Groundwater  $p\text{CO}_2$  data, sampled adjacent to mountain streams in Switzerland.

| <b>Catchment</b> | <b>Latitude</b> | <b>Longitude</b> | <b>Groundwater<br/><math>p\text{CO}_2</math> (<math>\mu\text{atm}</math>)</b> | <b>Reference</b>                                              |
|------------------|-----------------|------------------|-------------------------------------------------------------------------------|---------------------------------------------------------------|
| A                | 46.2305         | 7.10042          | 748                                                                           | Åsa Horgby,<br><i>unpublished data</i>                        |
| A                | 46.2296         | 7.10156          | 1789                                                                          | Åsa Horgby,<br><i>unpublished data</i>                        |
| A                | 46.2296         | 7.10156          | 976                                                                           | Andrea Popp, James Thornton,<br><i>personal communication</i> |
| A                | 46.2296         | 7.10152          | 245                                                                           | Andrea Popp, James Thornton,<br><i>personal communication</i> |
| A                | 46.2295         | 7.1012           | 1936                                                                          | Andrea Popp, James Thornton,<br><i>personal communication</i> |
| A                | 46.2305         | 7.10042          | 1729                                                                          | Andrea Popp, James Thornton,<br><i>personal communication</i> |
| A                | 46.2305         | 7.10042          | 1362                                                                          | Andrea Popp, James Thornton,<br><i>personal communication</i> |
| A                | 46.2301         | 7.10035          | 1343                                                                          | Andrea Popp, James Thornton,<br><i>personal communication</i> |
| A                | 46.2301         | 7.10035          | 1072                                                                          | Andrea Popp, James Thornton,<br><i>personal communication</i> |
| B                | 45.8831         | 7.13095          | 6303                                                                          | Lluís Gómez Gener,<br><i>personal communication</i>           |
| B                | 45.8831         | 7.13095          | 2230                                                                          | Lluís Gómez Gener,<br><i>personal communication</i>           |

## Supplementary References

1. Marx, A. et al. A review of CO<sub>2</sub> and associated carbon dynamics in headwater streams: a global perspective. *Rev. Geophys.* **55**, 560–585 (2017)
2. Hartmann, J., Lauerwald, R. & Moosdorf, N. A brief overview of the GLObal RIVER Chemistry Database, GLORICH. *Procedia Earth Planet. Sci.* **10**, 23–27 (2014).
3. Gaillardet, J., Dupré, B., Louvat, P. & Allègre, C. J. Global silicate weathering and CO<sub>2</sub> consumption rates deduced from the chemistry of large rivers. *Chem. Geol.* **159**, 3–30 (1999).
4. Clark, I. D. & Fritz, P. *Environmental isotopes in hydrogeology* (Lewis Publishers, New York, USA, 1997).
5. Pawellek, F. & Veizer, J. Carbon cycle in the upper Danube and its tributaries:  $\delta^{13}\text{C}_{\text{DIC}}$  constraints. *Isr. J. Earth Sci.* **43**, 187–194 (1994).
